# Supplementary material
Source: PubMed Central journal article supplement (PMC9038692)

**Supplementary Figure S1**

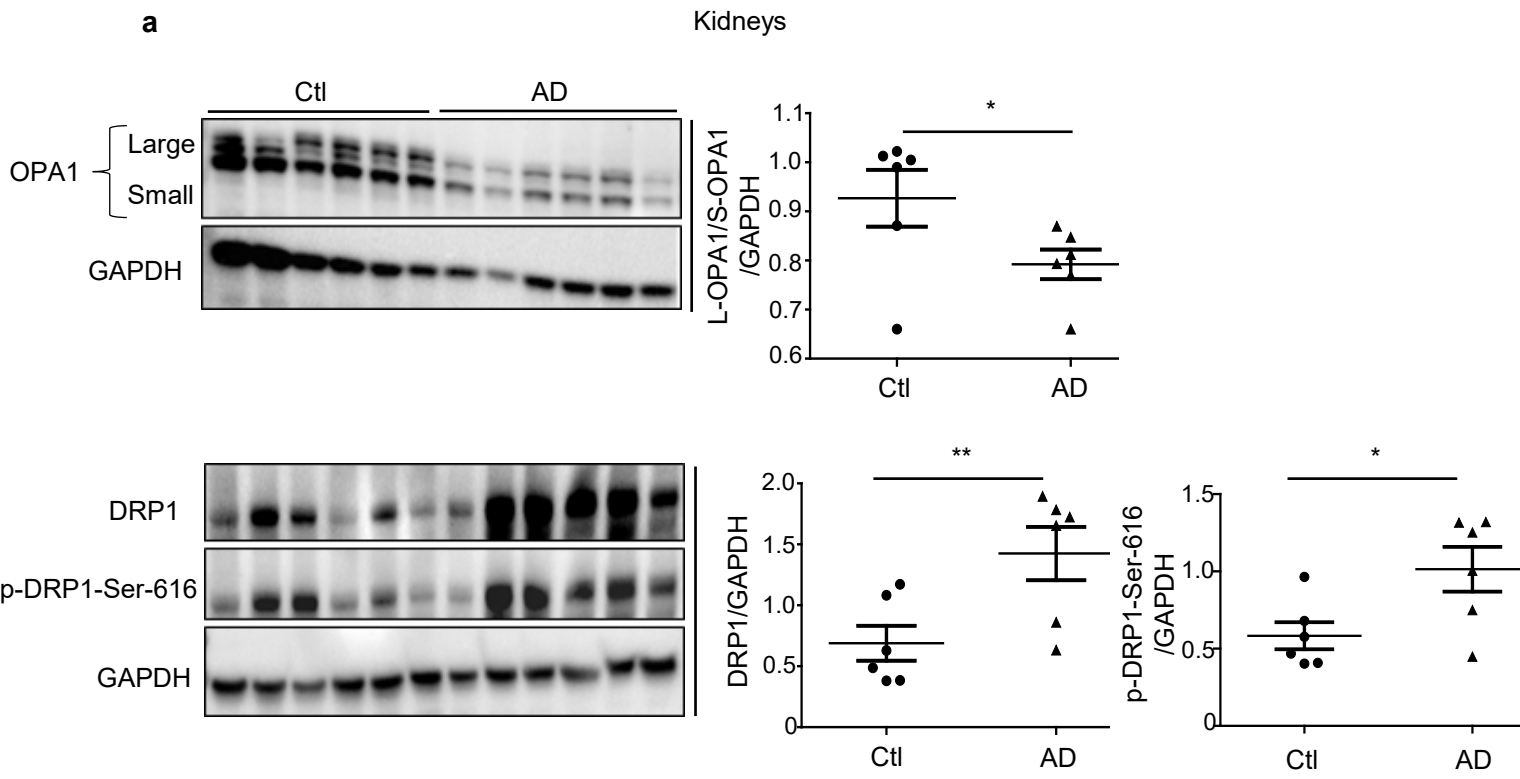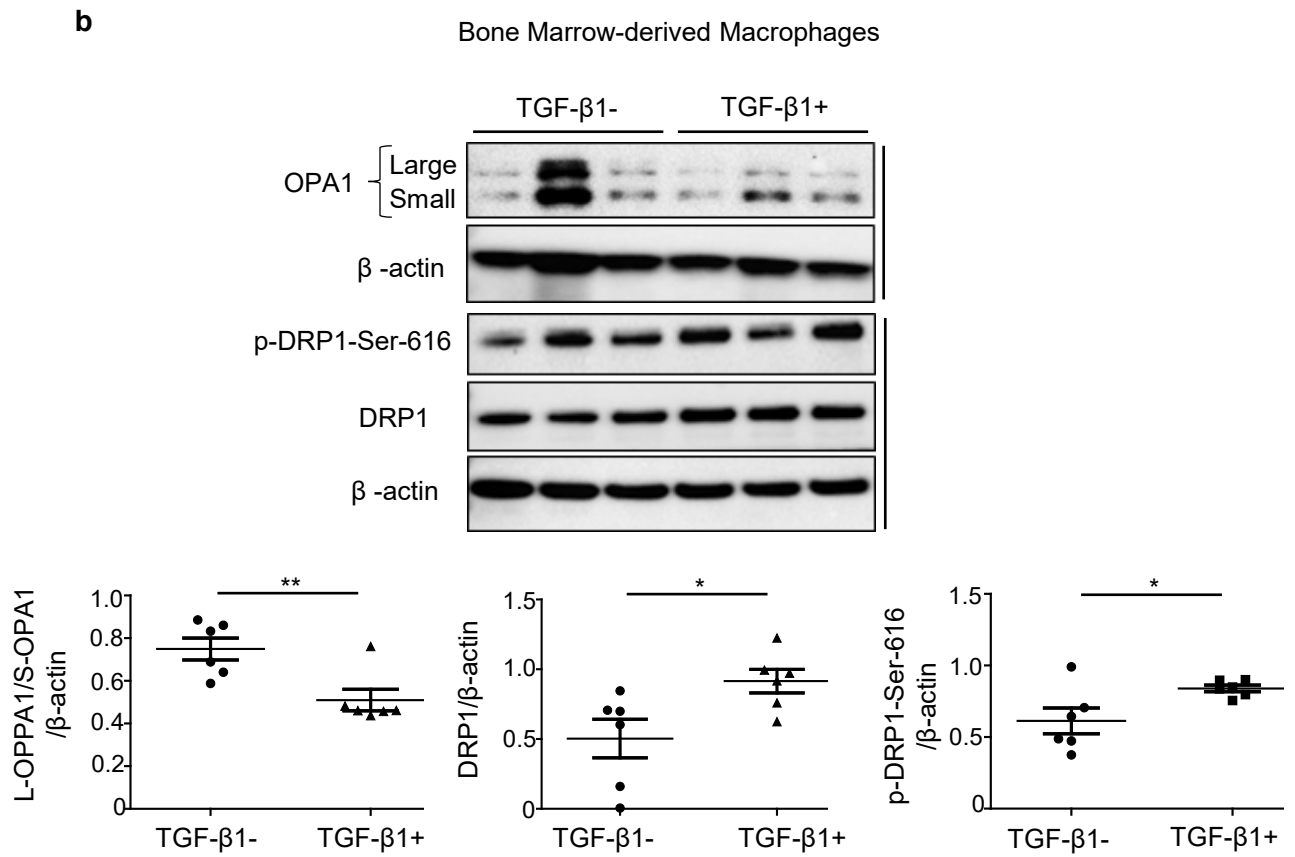

# Supplementary Figure S2

**a**

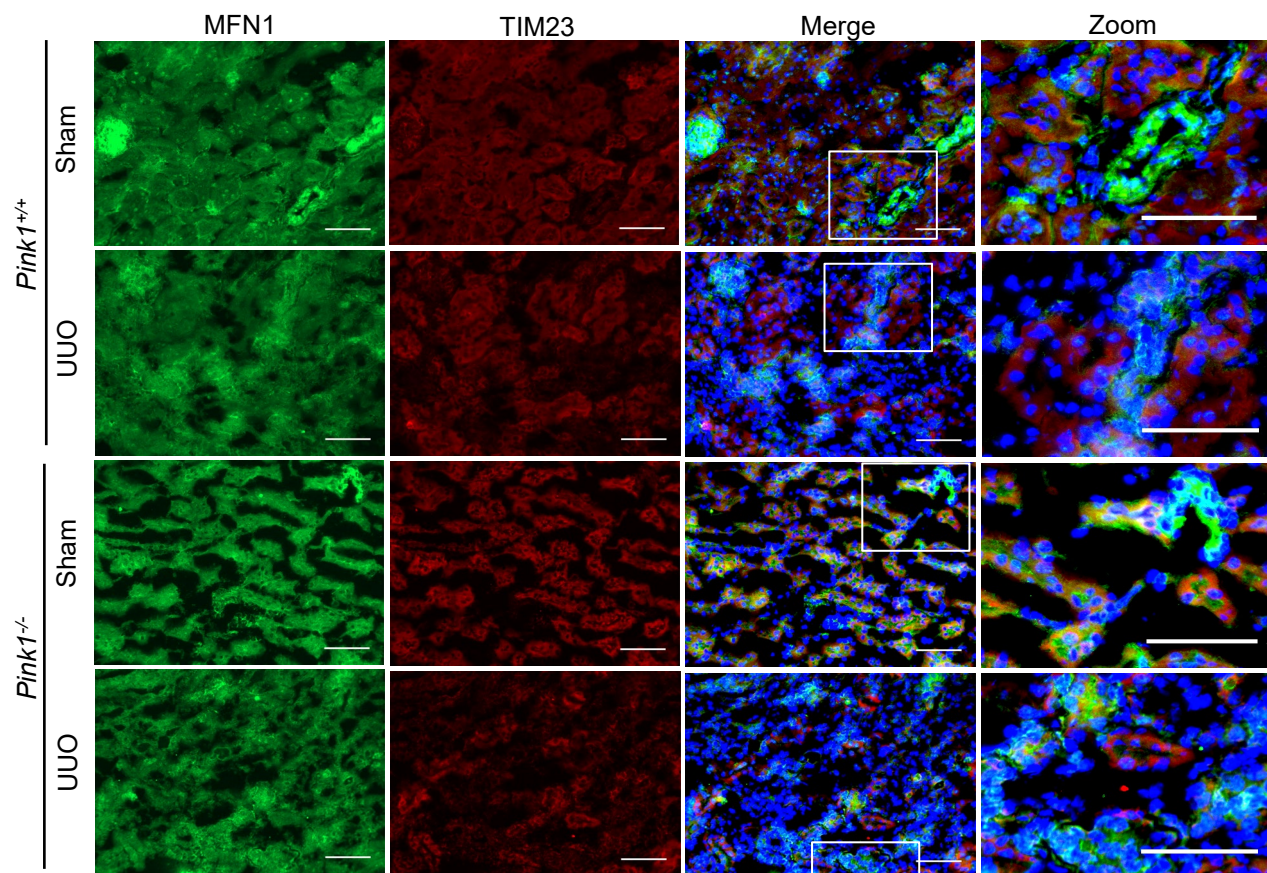

**b**

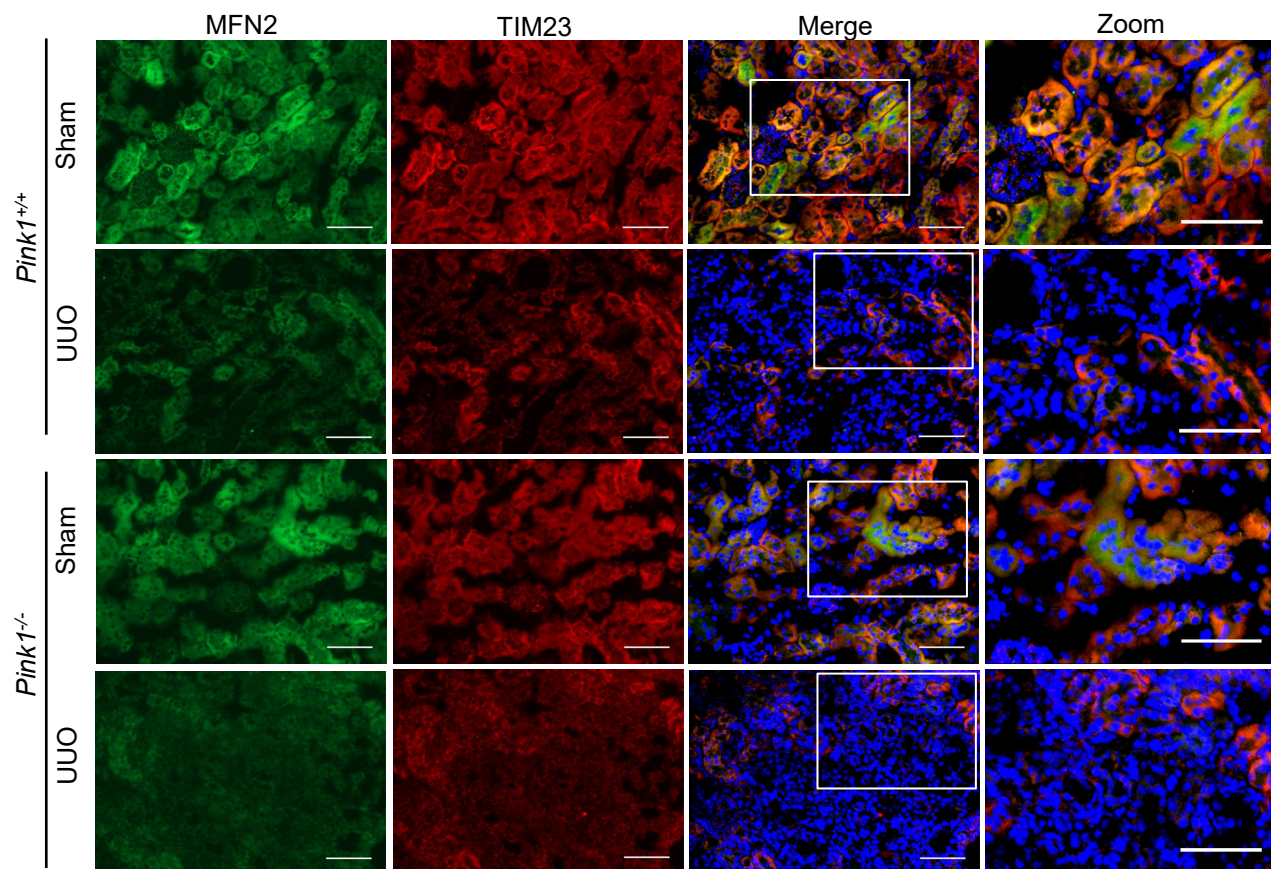

Supplementary Figure S2

c

MFN1 in CD11b+ F4/80+ Kidney Macrophages

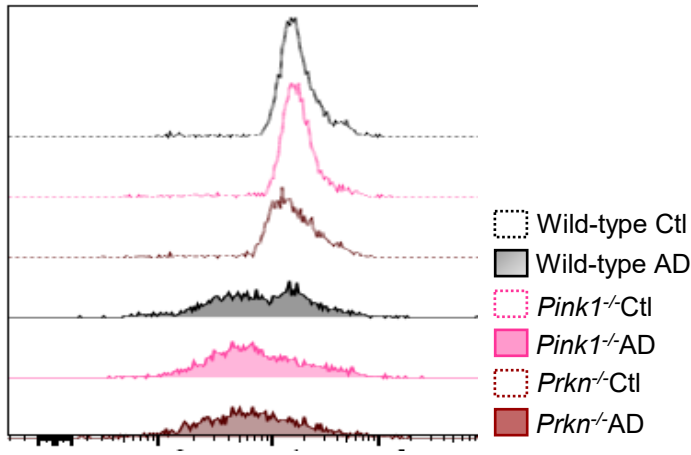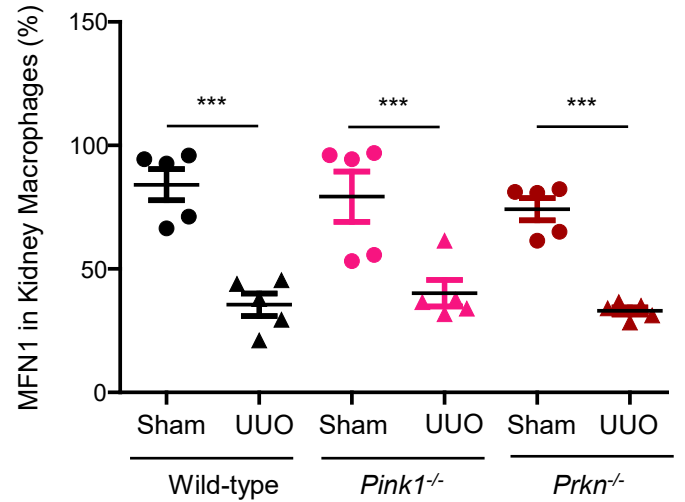

d

MFN2 in CD11b+ F4/80+ Kidney Macrophages

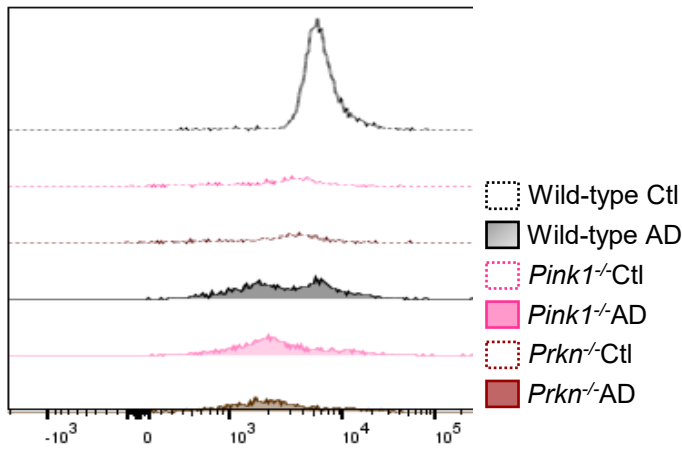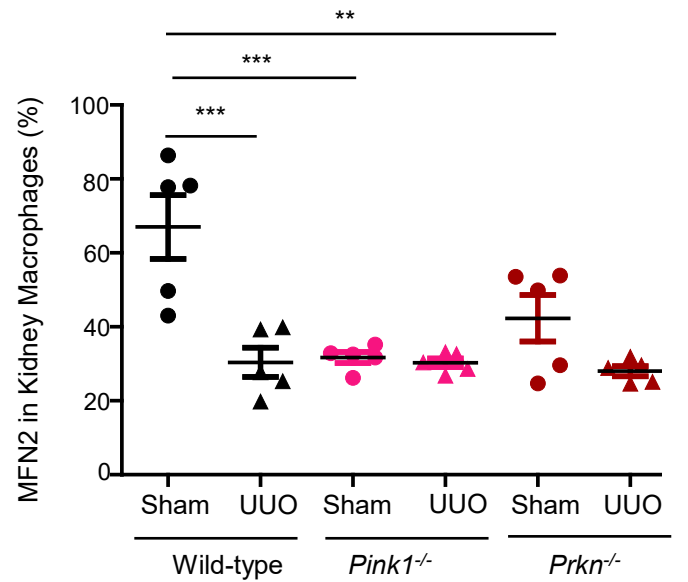

e

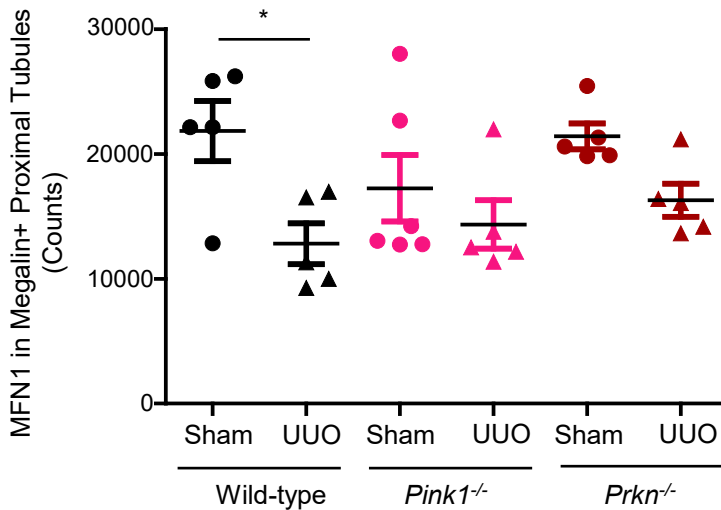

f

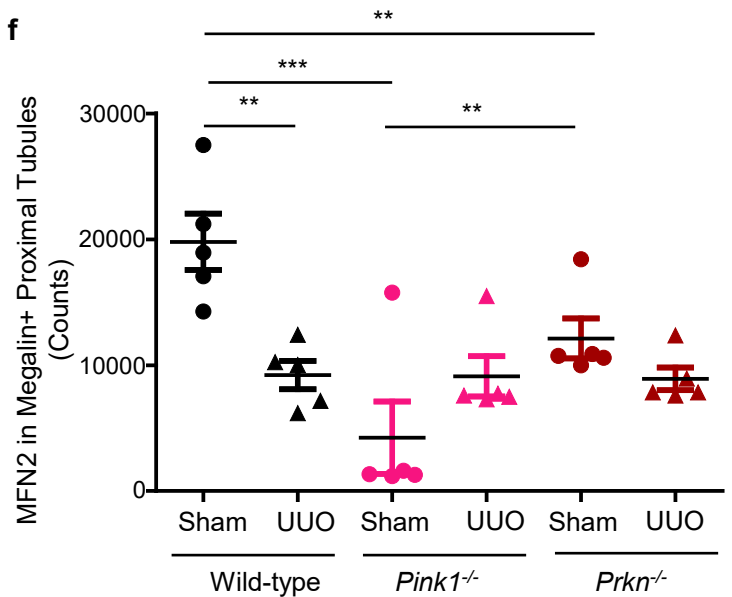



Supplementary Figure S3

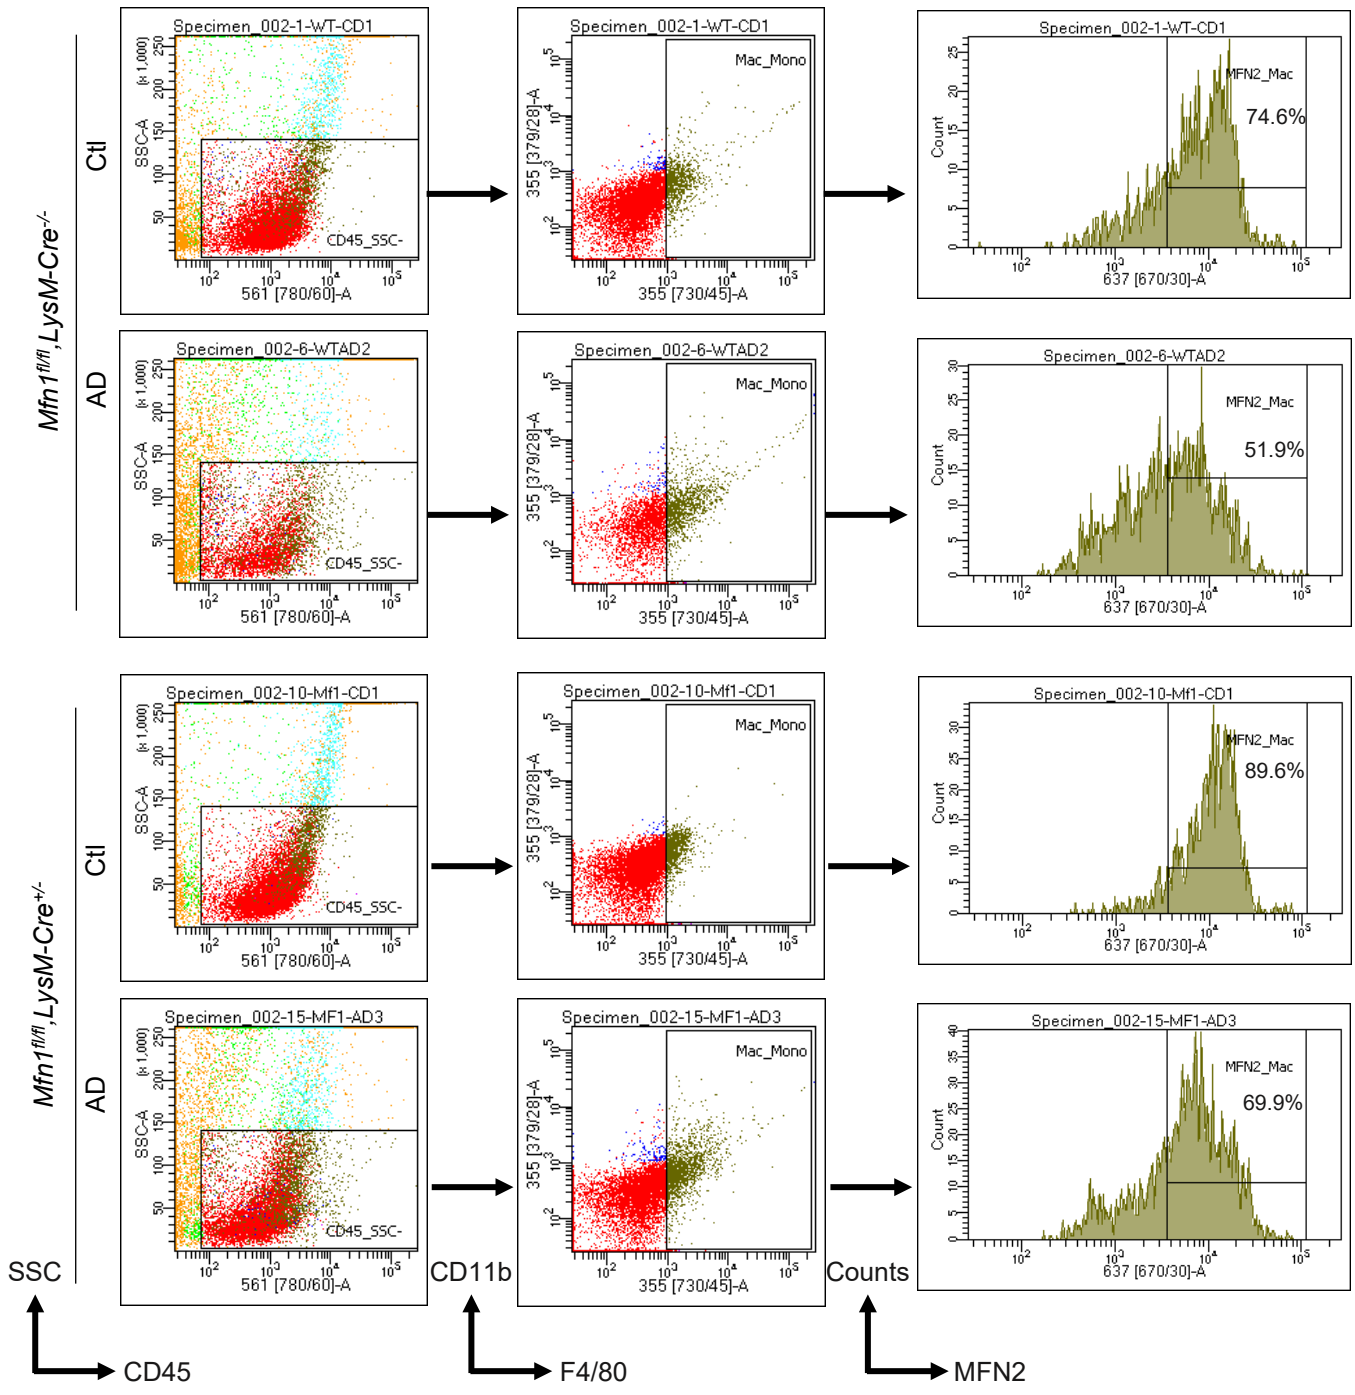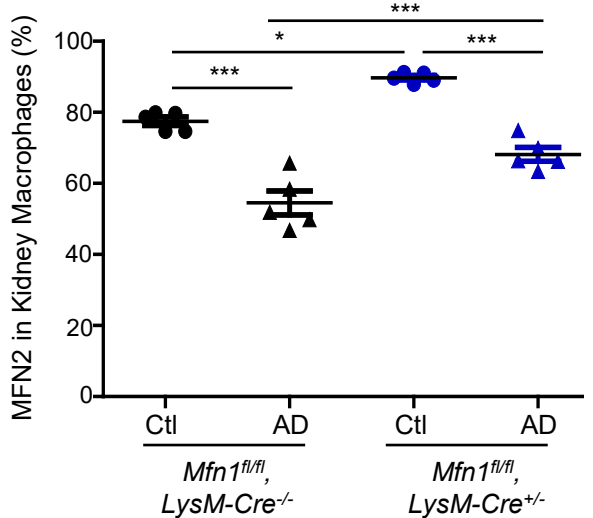

# Supplementary Figure S4

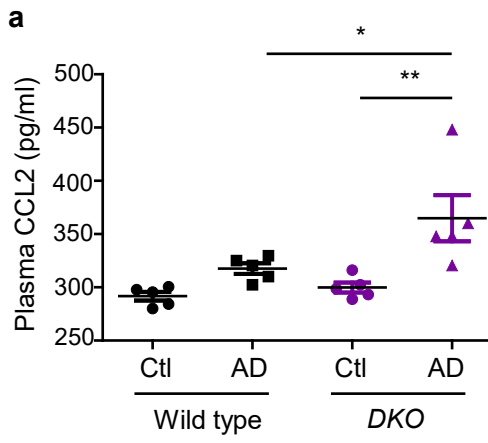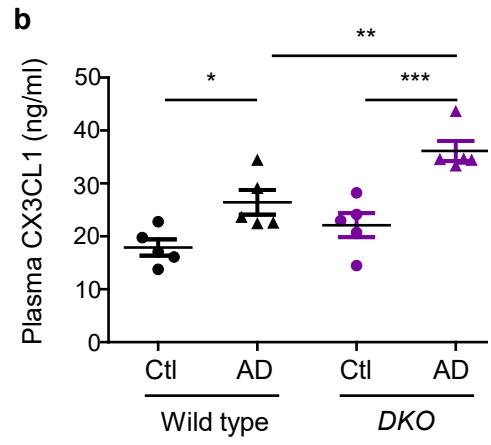

# Supplementary Figure S5

**a**

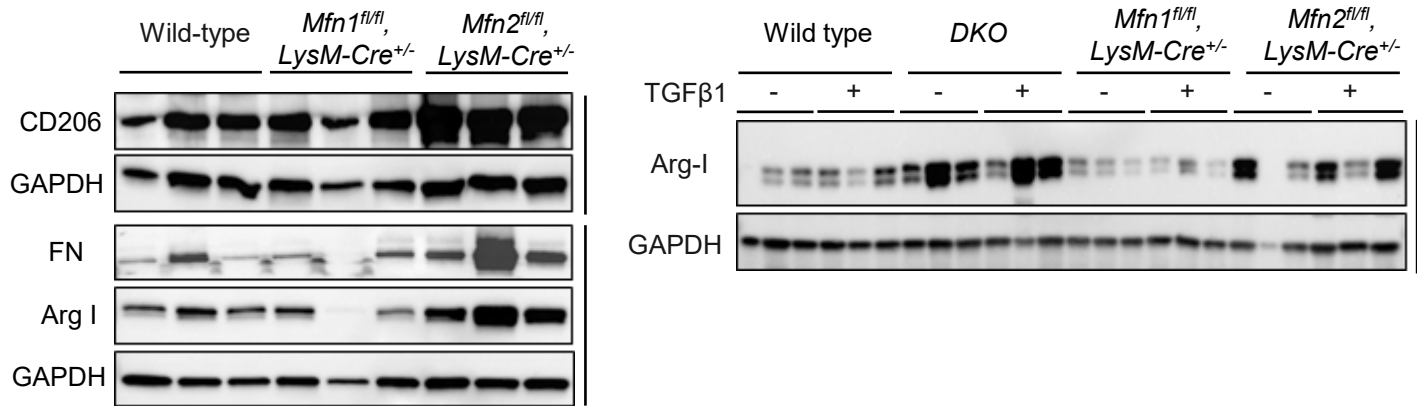

**b**

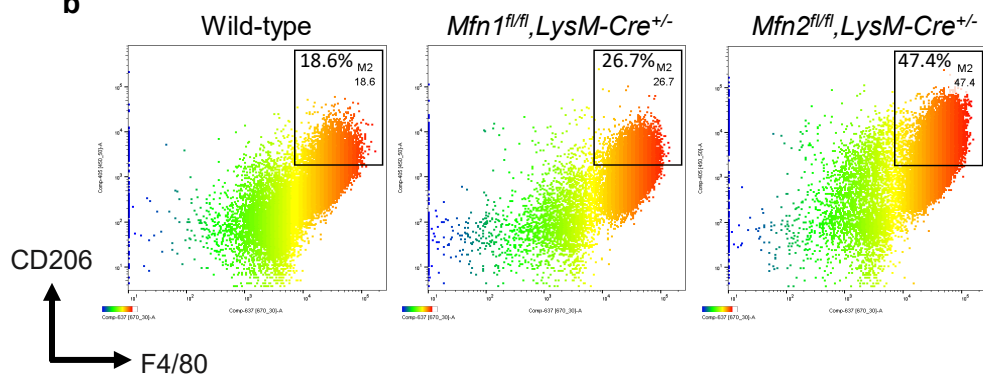

**Supplementary Figure S6**

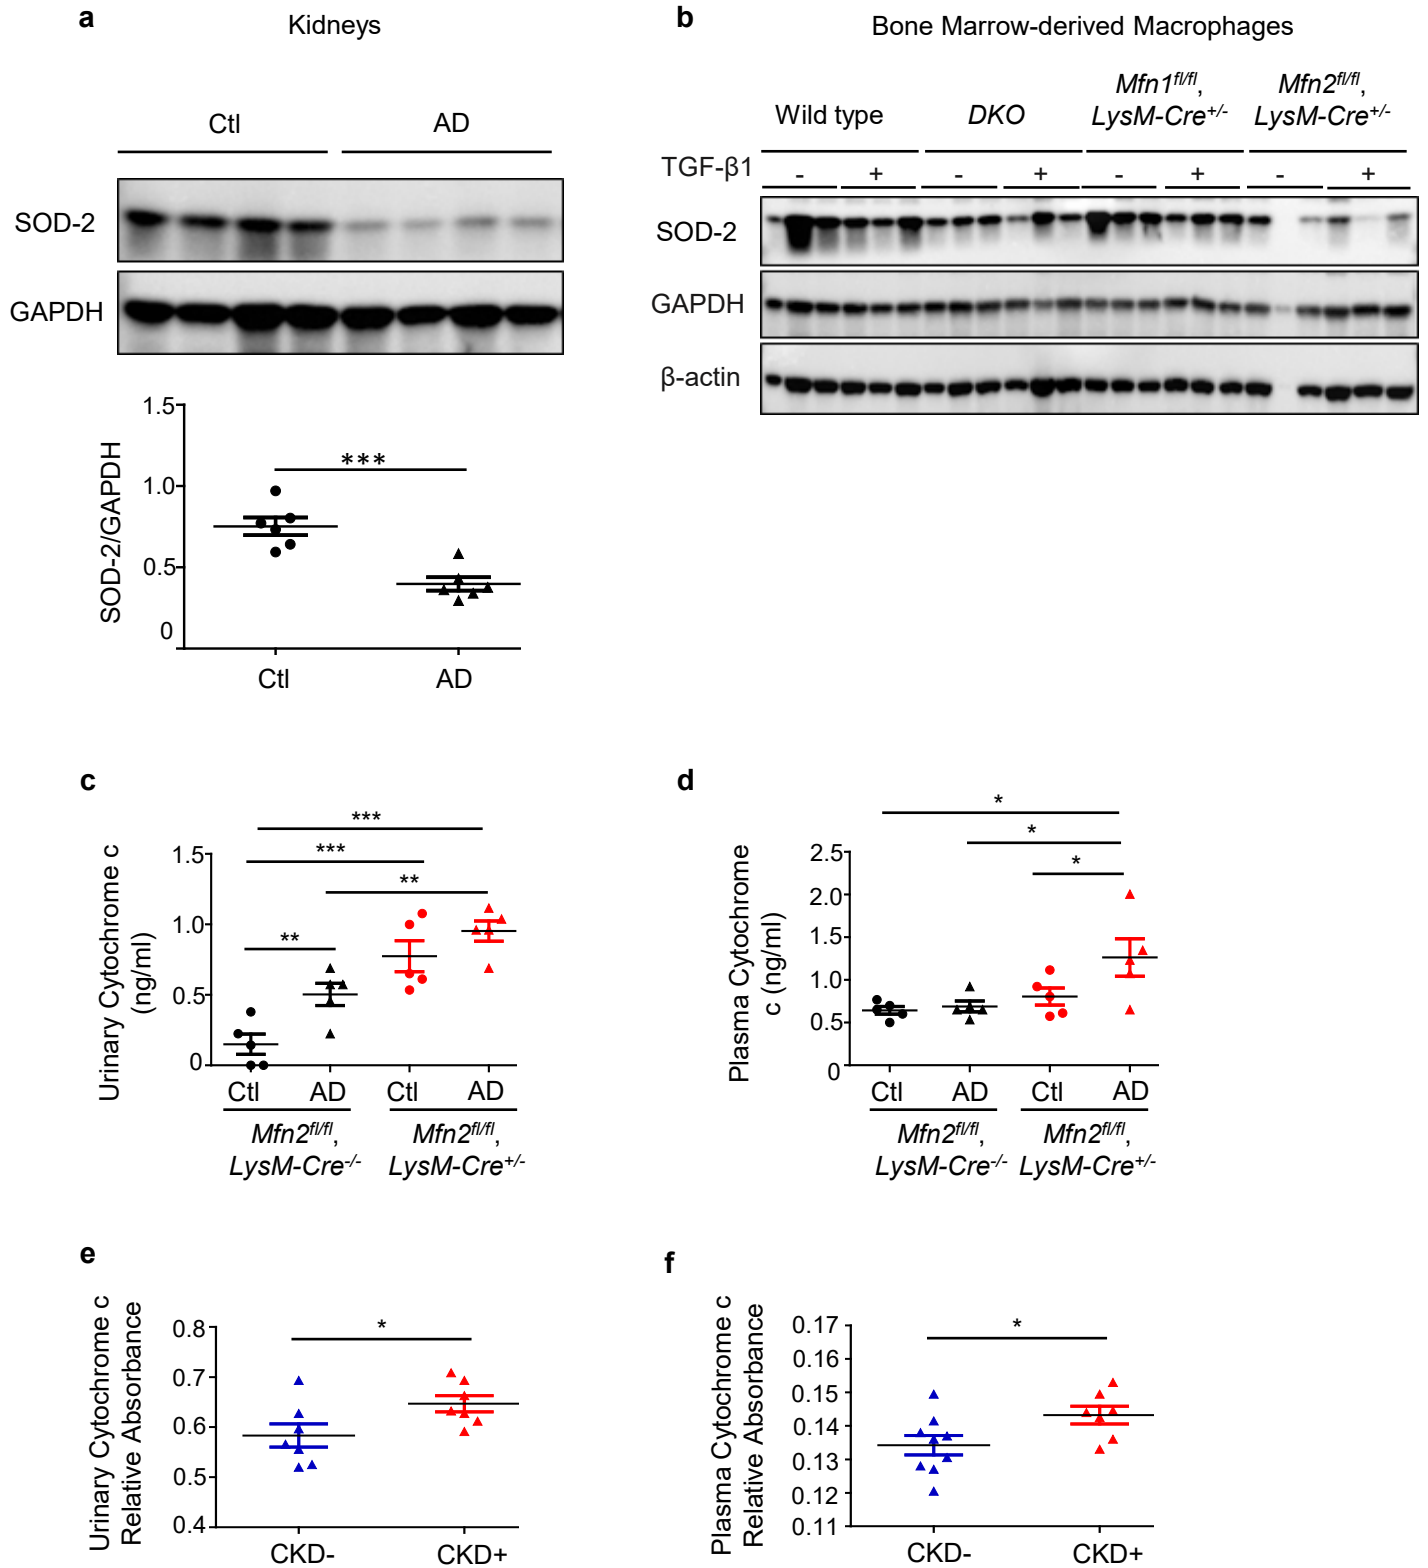

# Supplementary Figure S7

**a**

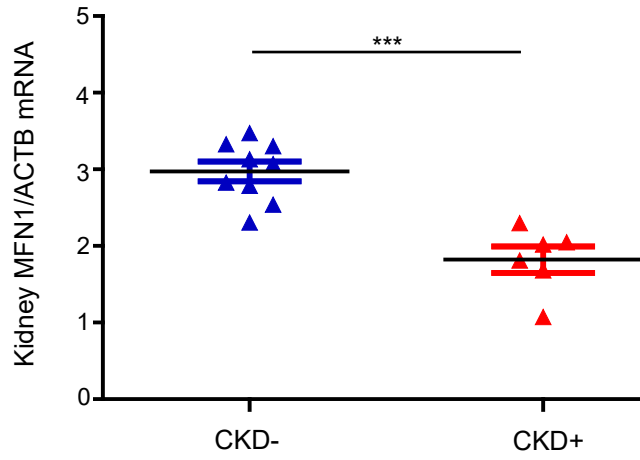

**b**

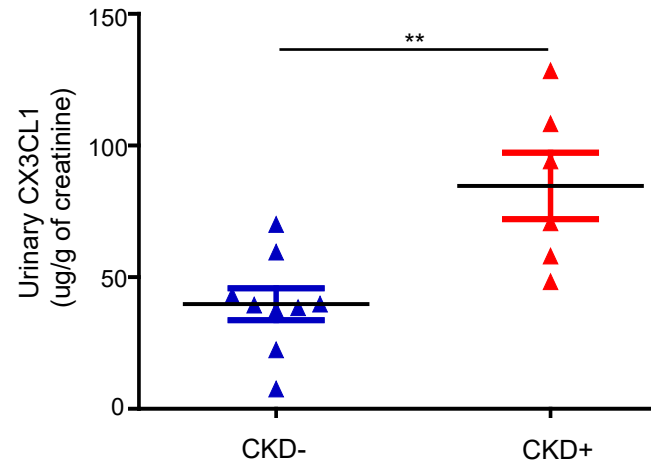

Supplement: NIHMS1784294-supplement-2.pdf [file NIHMS1784294-supplement-2.pdf]
